# Supplementary material for: Comprehensive investigation of multifunctional polyaniline/reduced graphene oxide nanocomposites synthesized from deep eutectic solvents: experimental, RSM, ANN and computational studies
Source: Royal Society of Chemistry journal article supplement (doi:10.1039/d4ma00231h), 2024-01-01
Supplement: d4ma00231h1.pdf [file d4ma00231h1.pdf]

## Electronic supplementary information (ESI)

### Comprehensive investigation of multifunctional polyaniline/reduced graphene oxide nanocomposites synthesized from deep eutectic solvents: Experimental, RSM, ANN and computational studies

Abir Boublia <sup>a,1</sup>, Zahir Guezzout <sup>b</sup>, Nacerddine Haddaoui <sup>a</sup>, Michael Badawi <sup>c</sup>, Imane Lakikza <sup>d</sup>, Ilyas Belkhattab <sup>e</sup>, Ouahiba Moumeni <sup>f</sup>, Saoussen Imene Aouni <sup>d</sup>, Manawwer Alam <sup>g</sup>, Yacine Benguerba <sup>h,\*</sup>

<sup>a</sup> *Laboratoire de Physico-Chimie des Hauts Polymères (LPCHP), Département de Génie des Procédés, Faculté de Technologie, Université Ferhat ABBAS Sétif-1, 19000, Sétif, **Algeria***

<sup>b</sup> *Unité de Recherche sur les Matériaux Emergents –Sétif- URMES, Equipe de Valorisation Des Polymères, Université Ferhat ABBAS Sétif-1, 19000, Sétif, **Algeria***

<sup>c</sup> *Université de Lorraine, CNRS, L2CM, F-57000 Metz, **France***

<sup>d</sup> *Laboratory of physics for matter and radiation, Mohamed Cherif Messadia-souk Ahras University, PO Box 1553 SoukAhras, 41000, **Algeria***

<sup>e</sup> *Laboratory of Electrochemistry-Corrosion, Metallurgy and Inorganic Chemistry, Faculty of Chemistry, USTHB, BP 32 El-Alia, 16111 Algiers, **Algeria***

<sup>f</sup> *Laboratoire d'Electrochimie des Matériaux Moléculaires et Complexes (LEMMC), Département de Génie des Procédés, Faculté de Technologie, Université Ferhat Abbas Setif-1, El-Maabouda, 19000, Sétif, **Algeria***

<sup>g</sup> *Department of Chemistry, College of Science, King Saud University, PO Box 2455, Riyadh, 11451, **Saudi Arabia***

<sup>h</sup> *Laboratoire de Biopharmacie Et Pharmacotechnie (LPBT), Ferhat Abbas Sétif 1 University, 19000, Sétif, **Algeria***

<sup>1</sup>First authorship: Abir Boublia

**\*Corresponding authors:**

E-mail address: [yacinebenguerba@univ-setif.dz](mailto:yacinebenguerba@univ-setif.dz) (Yacine Benguerba)

**Caption****Page No.**

**Figure S1.** FT-IR spectra showing the various functional groups present in rGO.

S2

**Figure S2.** FT-IR spectra showing the various functional groups present in pure PANI.

S2

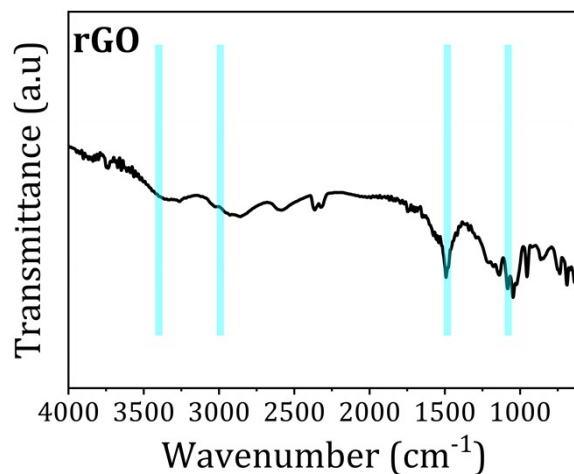

**Figure S1.** FT-IR spectra showing the various functional groups present in rGO.

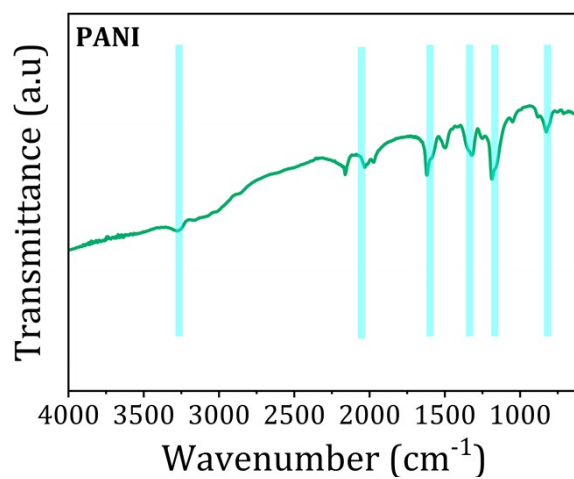

**Figure S2.** FT-IR spectra showing the various functional groups present in pure PANI.
